# Supplementary material
Source: publisher figshare collection journal article supplement (https://acs.figshare.com/ndownloader/files/4541758)
Supplement: Supplementary file 1 [file 4541758]

Support information for :

# Metal Nanoparticle/Ionic Liquid/Cellulose: New Catalytically Active Membrane Materials for Hydrogenation Reactions

*Marcos A. Gelesky, Carla W. Scheeren, Lucas Foppa, Flavio A. Pavan, Silvio L. P. Dias, and  
Jairton Dupont*

Institute of Chemistry– UFRGS–Porto Alegre - RS - Brazil<sup>b)</sup> UNIPAMPA– Universidade  
Federal do Pampa– Bagé – RS – Brazil <sup>c)</sup> Institute of Chemistry and Biotechnology– UFAL–  
Universidade Federal de Alagoas –Maceió - AL– Brazil.

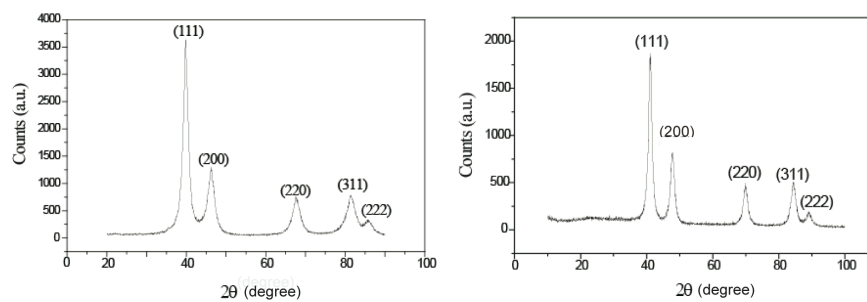

**Figure. S1.** XRD analysis of Pt(0) (left) and Rh(0) (right) of isolated nanoparticles.

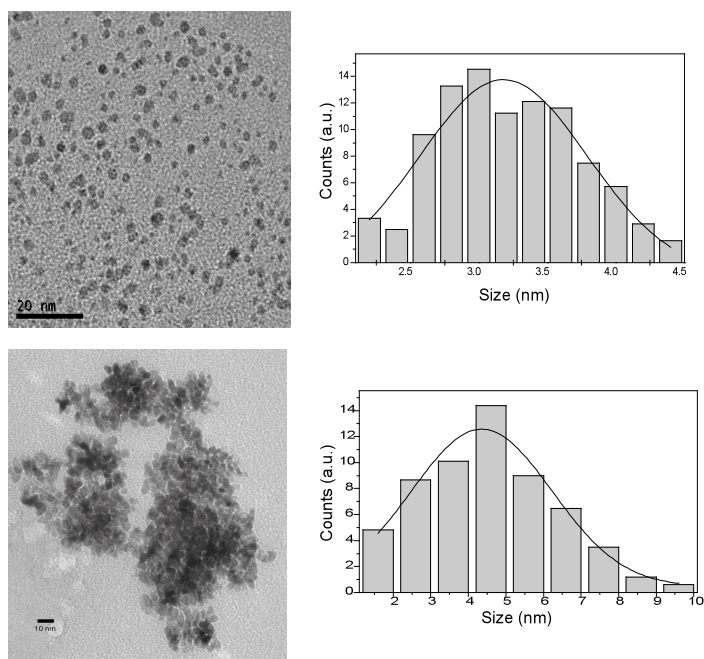

**Figure. S2.** TEM micrograph of Pt(0) (top) and Rh(0) (bottom) nanoparticles in the IL (left) and histogram (right) illustrating the particle size distribution.

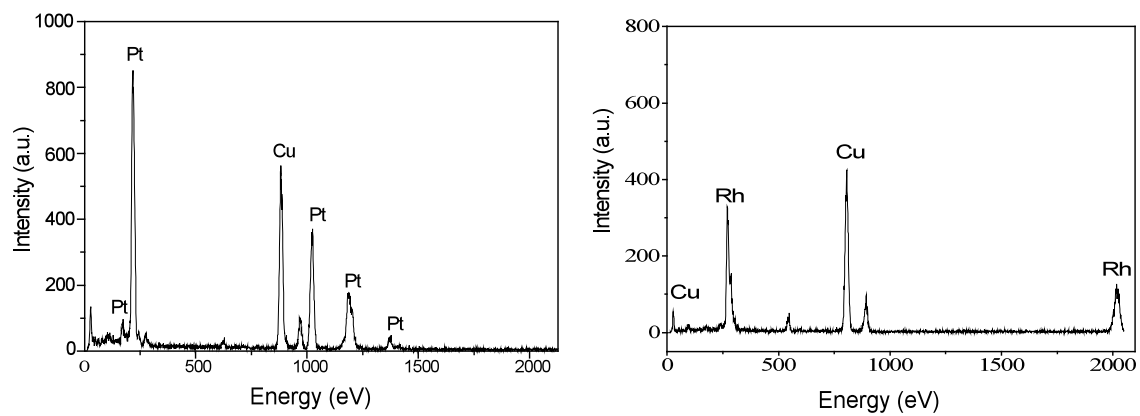

**Figure. S3.** EDS of Pt(0) (right) and Rh(0) nanoparticles.

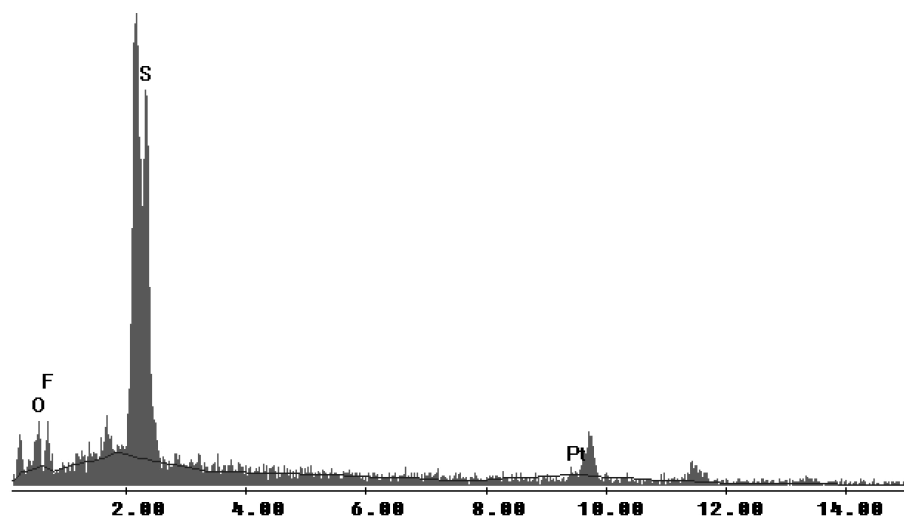

**Figure. S4.** EDS of of CA/IL/Pt(0) membrane with 1.0 g of ionic liquid BMI.N(Tf)<sub>2</sub>.

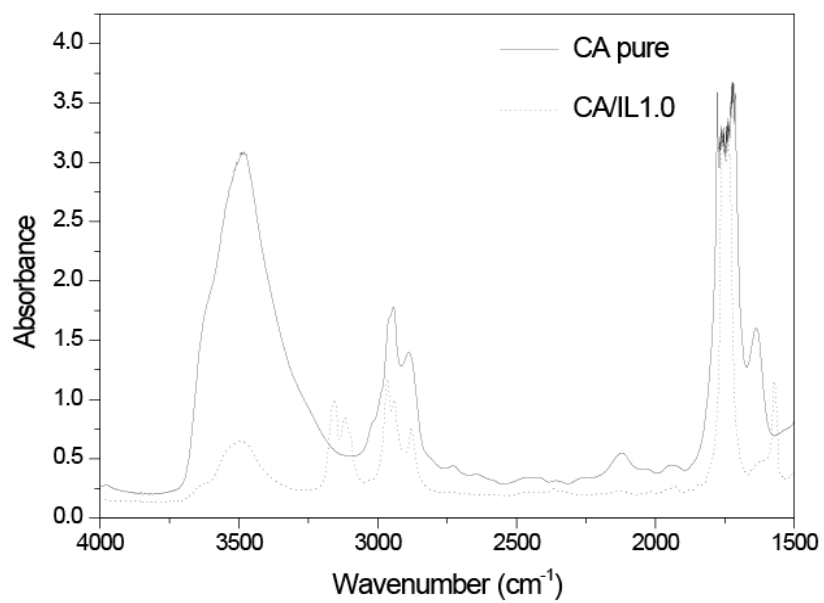

**Figure. S5.** Infrared spectra of the pure cellulose acetate and membrane CA/IL 1.0g of ionic liquid BMI.N(Tf)<sub>2</sub>.

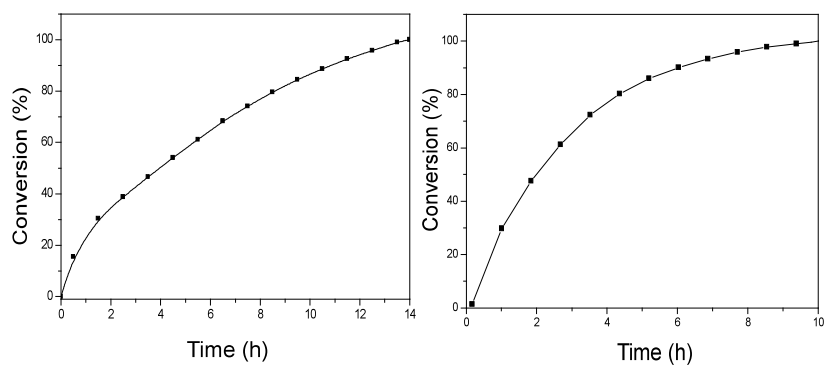

**Figure. S6.** Hydrogenation of cyclohexene by CA/IL/Rh(0) (left) and CA/IL/Pt(0) (right) 4 atm H<sub>2</sub>, 75 °C.

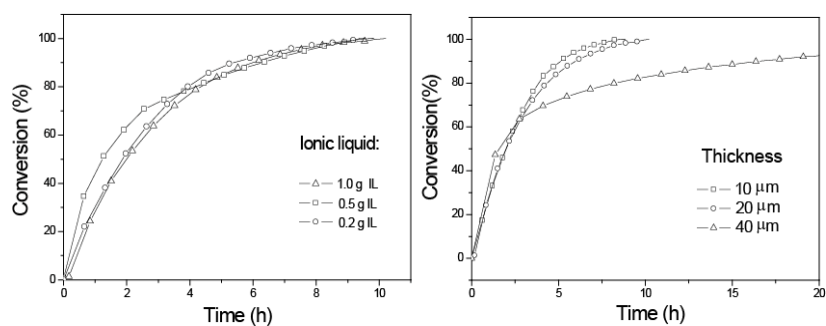

**Figure. S7.** Hydrogenation of cyclohexene with CA/IL/Pt(0) using different concentration of ionic liquid  $\text{BMI.N(Tf)}_2^-$  (left) and using different membrane thickness (right), with 4 atm  $\text{H}_2$ , 75 °C.
